# Supplementary material for: Robust C–C bonded porous networks with chemically designed functionalities for improved CO2 capture from flue gas
Source: publisher site journal article supplement (doi:10.3762/bjoc.12.220), 2016-10-28
Supplement: Additional file 1 [file 1860-5397-12-220-S1.pdf]

## Supporting Information

for

# Robust C–C bonded porous networks with chemically designed functionalities for improved CO<sub>2</sub> capture from flue gas

Damien Thirion<sup>1</sup>, Joo. S. Lee<sup>1</sup>, Ercan Özdemir<sup>1</sup> and Cafer T. Yavuz\*<sup>1,2</sup>

Address. <sup>1</sup>Graduate School of Energy, Environment, Water, Sustainability (EEWS)  
and <sup>2</sup>Department of Chemistry, Korea Advanced Institute of Science and Technology  
(KAIST), Guseong Dong, Yuseong Gu, Daejeon 305–701, Korea,  
[www.porouspolymers.com](http://www.porouspolymers.com), +82-42-350-1718

Email: Cafer Tayyar Yavuz\* - [yavuz@kaist.ac.kr](mailto:yavuz@kaist.ac.kr)

\*Corresponding author

### Materials and methods

All chemicals and solvents were obtained from Sigma-Aldrich, Alfa Aesar, TCI Japan or Samchun Pure Chemicals, Korea and were used without further purification unless otherwise specified. THF was dried and collected from a Hansen Glass Contour Ultimate Solvent Purification 5 System. Infrared spectra (FTIR) were recorded at KAIST energy and environment research center with a Jasco FT/IR-4100 type-A spectrometer using KBr pellets. Thermogravimetric analyses were performed on a Shimadzu DTG-60A by heating the samples up to 800 °C at a rate of 10 °C min<sup>-1</sup> under nitrogen atmosphere. Elemental analysis was performed at the KAIST Central

Research Instrument Facility on a Thermo Scientific FLASH 2000 equipped with a TCD detector for carbon, nitrogen and hydrogen and on a Thermo Finnigan Flash EA 1112 for oxygen. Each experimental batch is measured twice and the elemental composition is given as a mean value of the two measurements. Textural characterization of polymers was carried out from nitrogen adsorption isotherms using a Micromeritics 3FLEX accelerated surface area and porosimetry analyzer at 77 K. Prior to measurement, samples were degassed at 423 K for 5 h under vacuum. The specific surface areas were derived from Brunauer–Emmett–Teller (BET) method. Pore size distribution was calculated with the Micromeritics 3FLEX software using a multi-walled carbon nanotube NLDFT model assuming cylindrical pore shape. This model was chosen as it gave the best fit between experiment and calculation.  $Q_{st}$  values were calculated with two temperatures using the 3Flex software. Moist CO<sub>2</sub> uptake was performed on a custom made TGA system. Moist gases are obtained by injecting the gas into a water bubbler (250 mL) before entering the TGA system. 6–8 mg of dry sample was degassed in dry N<sub>2</sub> (50 mL/min) at 120°C for one hour. After cooling down to 40 °C, the gas was changed to moist N<sub>2</sub> and mass uptake was measured for 2 h. As nitrogen uptake is several orders of magnitude lower than CO<sub>2</sub> in porous materials, it can be considered negligible and the collected data is used as background to determine the water uptake of the sample. After regeneration under vacuum at 100 °C overnight, the samples were degassed in dry N<sub>2</sub> (50 mL/min) at 120 °C for one hour. After cooling down to 40 °C, the gas was changed to moist CO<sub>2</sub> and mass uptake was measured for 2 h. The collected data from moist N<sub>2</sub> uptake is subtracted from the collected moist CO<sub>2</sub> data to give the actual moist CO<sub>2</sub> uptake reported in the main text.

## Synthesis

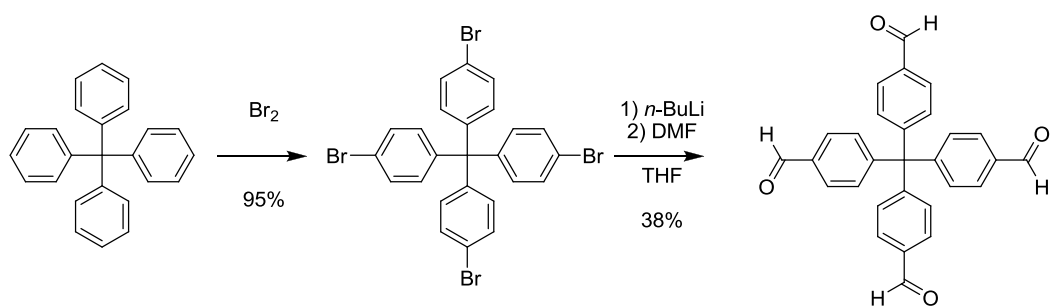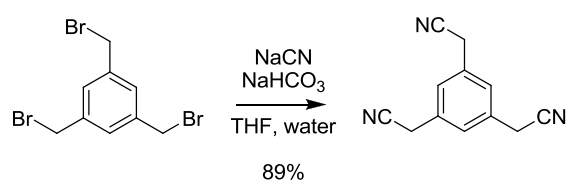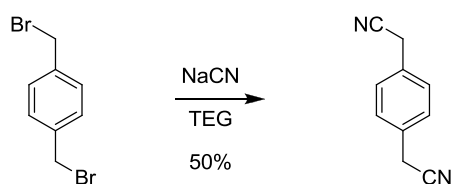

2,2'-(1,4-phenylene)diacetonitrile, 2,2',2''-(benzene-1,3,5-triyl)triacetonitrile and tetrakis(4-formylphenyl)methane were synthesized according to reported procedures.<sup>S1-3</sup>

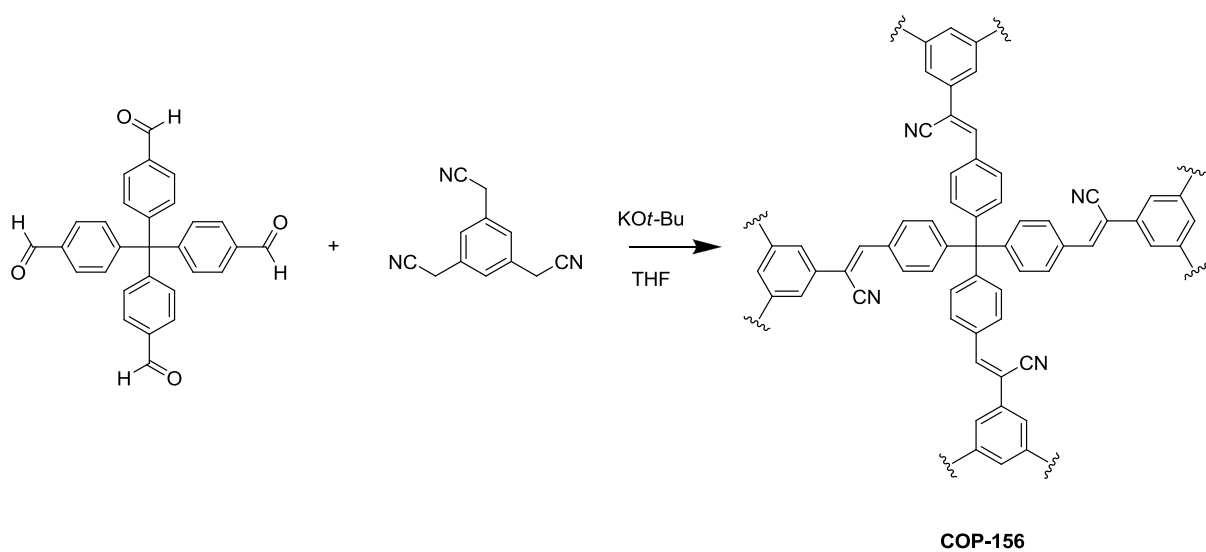

**Synthesis of COP-156** was performed in a similar manner as our previous work<sup>S4</sup> : 2,2',2''-(benzene-1,3,5-triyl)triacetonitrile (180 mg, 0.92 mmol) and tetrakis(4-formylphenyl)methane (300 mg, 0.69 mmol) were dissolved in dry THF (40 mL) at room temperature under nitrogen. Potassium *tert*-butoxide (311 mg, 2.78 mmol) in THF (40 mL) was added dropwise and the mixture was stirred for 12 hours at room temperature. Afterwards, the reaction mixture was poured into 200 mL of acidified ethanol (5% glacial AcOH). The resulting precipitate was separated by filtration, washed with ethanol and dried in vacuum at 80 °C overnight. COP-156 was afforded as a pale yellow solid (289 mg).

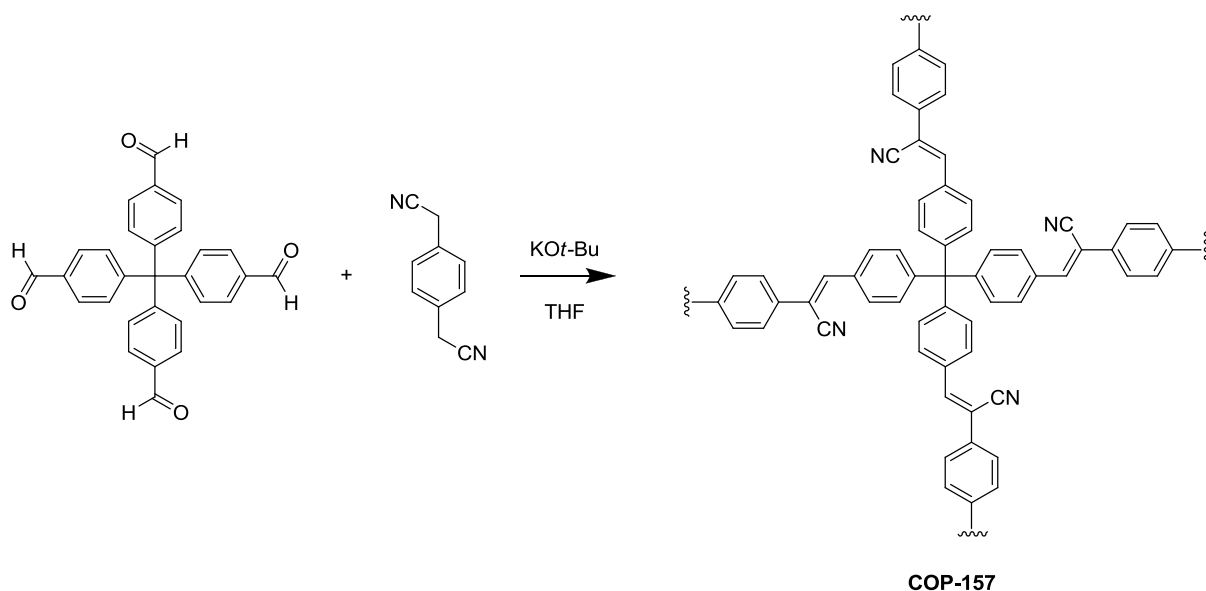

**Synthesis of COP-157:** Same procedure as COP-156 using 2,2'-(1,4-phenylene)diacetonitrile (215 mg, 1.38 mmol). COP-157 was afforded as a pale yellow solid (232 mg).

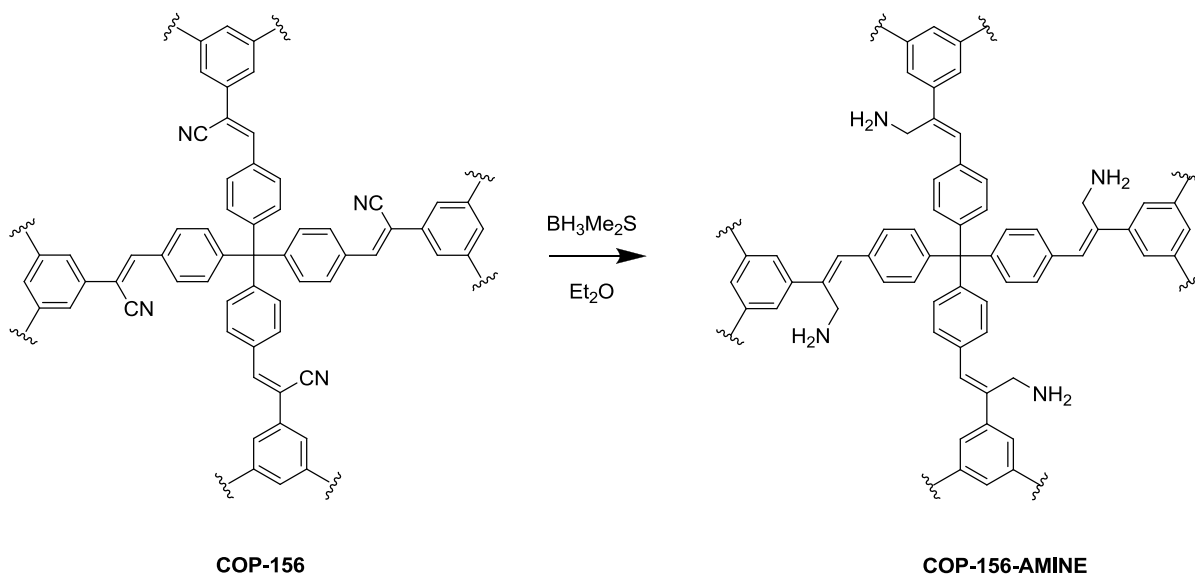

**Synthesis of COP-156-amine:** COP-156 (150 mg) was dispersed in dry ether (5 mL) at room temperature under nitrogen.  $\text{BH}_3\text{-Me}_2\text{S}$  (5 M in ether, 2.5 mL) was added dropwise and the mixture was left to stir for 12 h. The mixture was quenched with MeOH, the solid filtered off and washed in a Soxhlet extractor for 24 h with MeOH. COP-156-Amine (127 mg) was afforded as an off-white powder after drying under vacuum at 80 °C for 12 h.

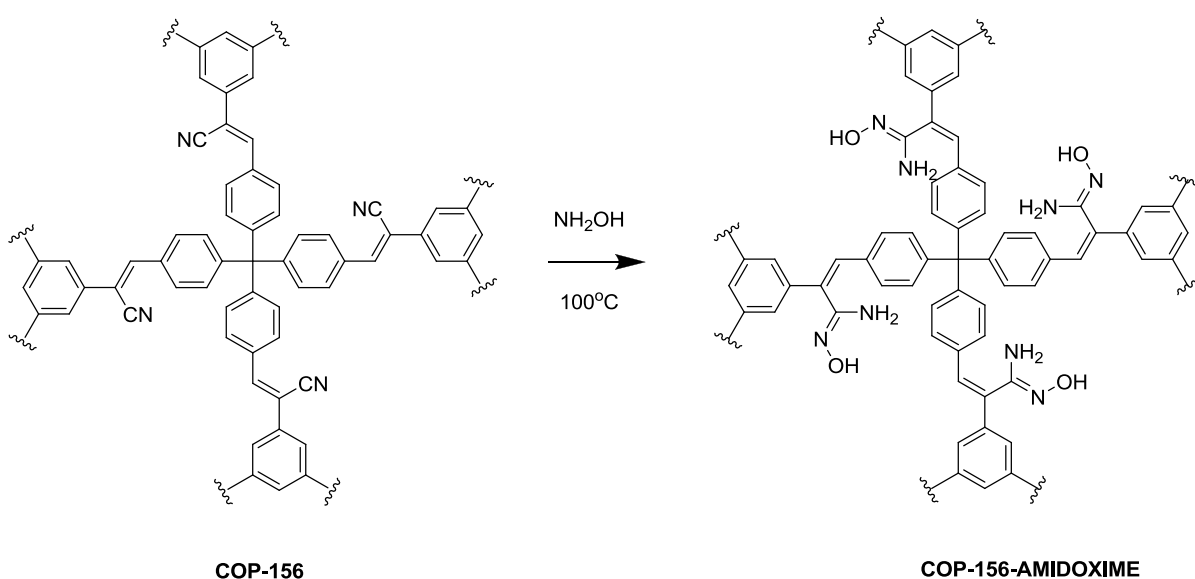

**Synthesis of COP-156-amidoxime:** COP-156 (120 mg) was dispersed in an aqueous hydroxylamine solution (50 wt % in water, 10 mL) and heated to 100 °C for 12 h. The solid was filtered off and washed in a Soxhlet extractor for 24h with MeOH. COP-156-Amidoxime (92 mg) was afforded as a yellow powder after drying under vacuum at 80 °C for 12 h.

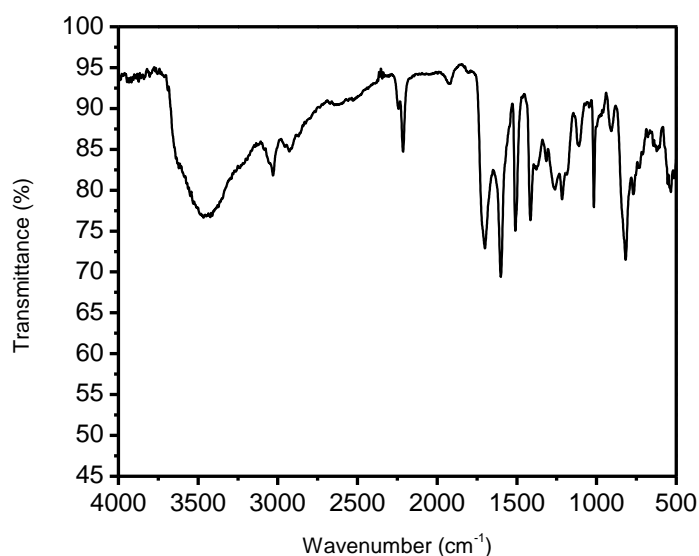

**Figure S1:** FTIR spectrum of COP-157.

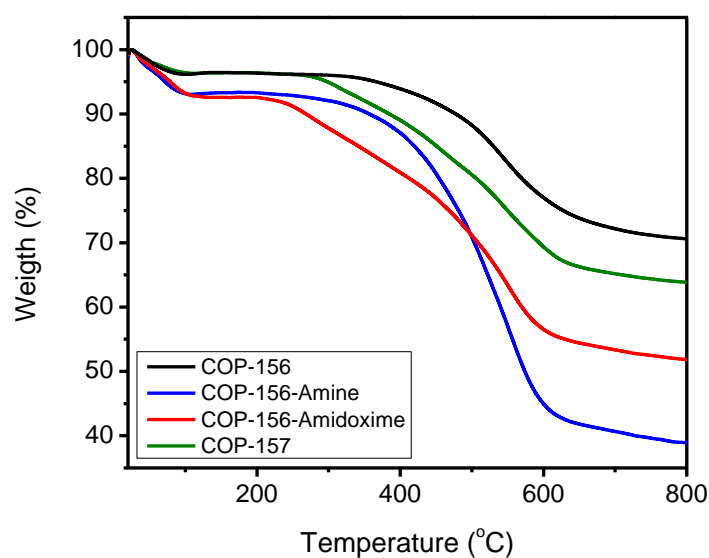

**Figure S2:** TGA analysis of COP-156 (black), COP-156-amine (blue), COP-156-amidoxime (red) and COP-157 (green).

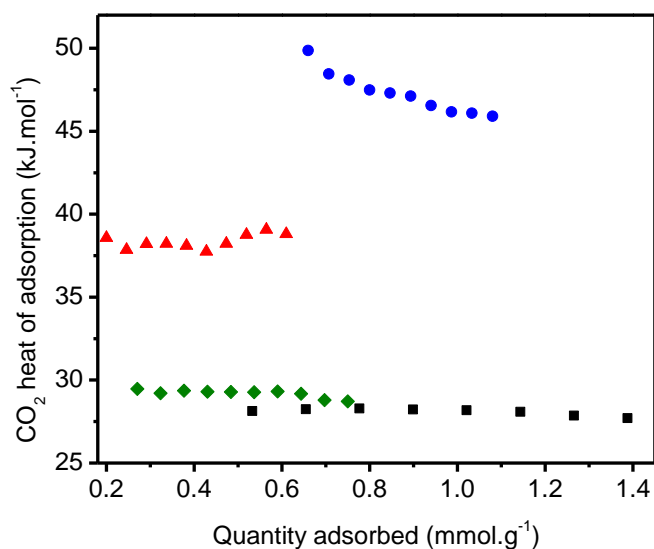

**Figure S3:** CO<sub>2</sub> heat of adsorption of COP-156 (black), COP-156-amine (blue), COP-156-amidoxime (red) and COP-157 (green).

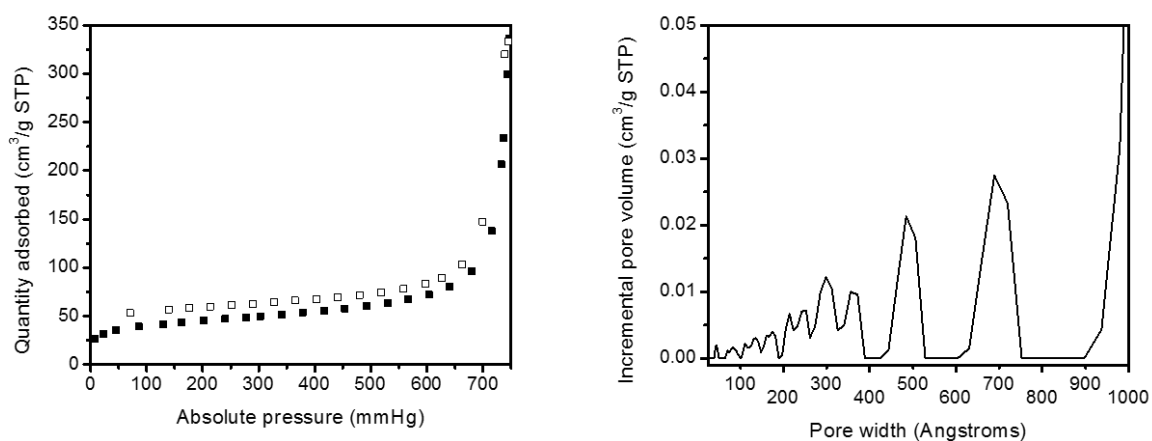

**Figure S4:** Left: Nitrogen adsorption (filled dots)-desorption (empty dots) isotherms at 77K; Right: Pore size distribution by NLDFT (N<sub>2</sub> 77 K, cylindrical pores, multi-walled carbon nanotubes) of COP-157.

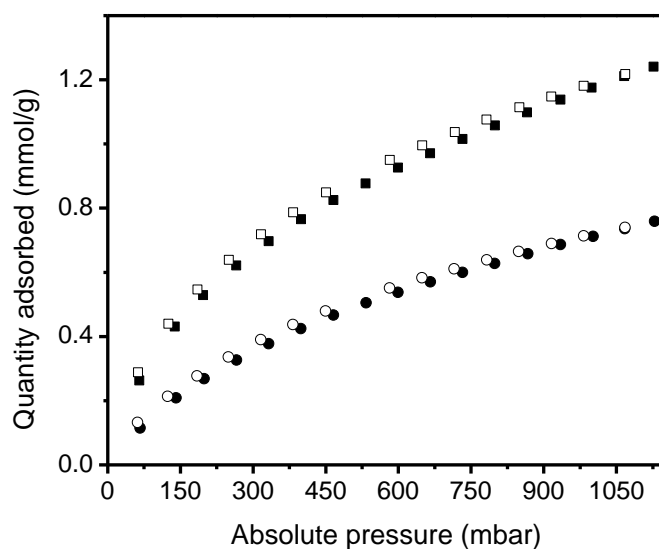

**Figure S5:** CO<sub>2</sub> adsorption (filled dots)-desorption (empty dots) isotherms at 273 K (square) and 298 K (circle) of COP-157.

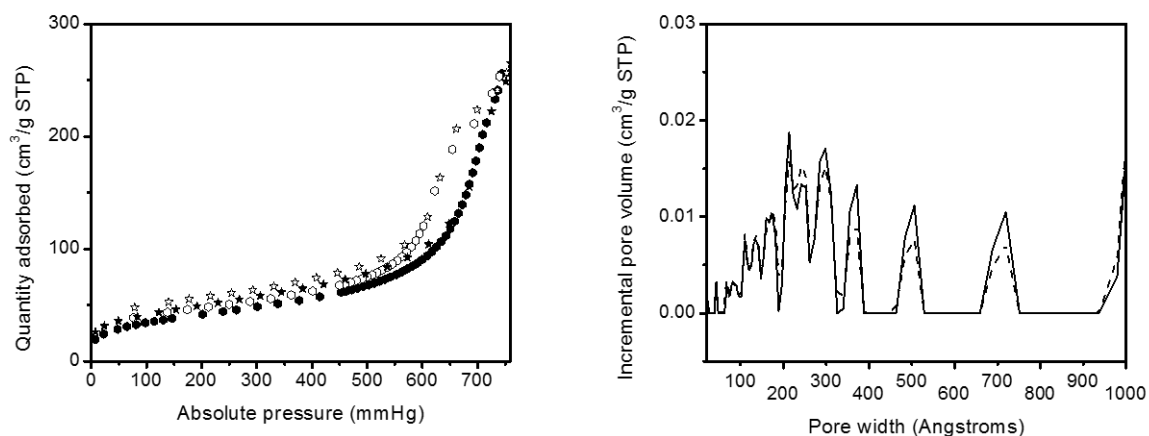

**Figure S6:** Left: Nitrogen adsorption (filled dots)-desorption (empty dots) isotherms at 77 K; Right: Pore size distribution by NLDFT (N<sub>2</sub> 77 K, cylindrical pores, multi-walled carbon nanotubes) of COP-156-amine by LiAlH<sub>4</sub> (hexagon, solid line) and COP-156-amine by BH<sub>3</sub>-THF (star, dashed line).



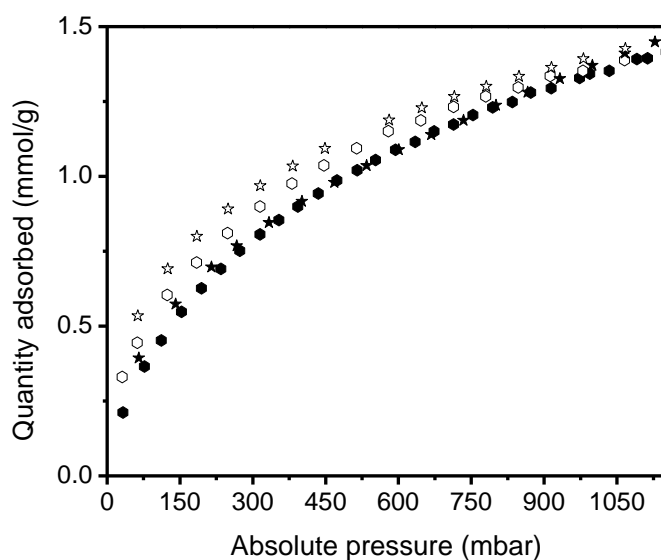

**Figure S7:** CO<sub>2</sub> adsorption (filled dots)-desorption (empty dots) isotherms at 273 K of COP-156-amine by LiAlH<sub>4</sub> (hexagon) and COP-156-amine by BH<sub>3</sub>-THF (star).

**Table S1:** BET surface area, CO<sub>2</sub> sorption properties at 273K of COP-156-Amine by different reducing agents.

| Structure                           | BET surface area (m <sup>2</sup> /g) | CO <sub>2</sub> at 0 °C (mmol/g)<br>0.15/1bar |
|-------------------------------------|--------------------------------------|-----------------------------------------------|
| COP-156-Amine (LiAlH <sub>4</sub> ) | 141                                  | 0.58/1.36                                     |
| COP-156-Amine(BH <sub>3</sub> -THF) | 165                                  | 0.55/1.35                                     |

**Table S2:** Elemental analysis of all networks

| Structure                                          | C     | H    | N    | O     |
|----------------------------------------------------|-------|------|------|-------|
| COP-156                                            | 79.73 | 4.21 | 7.86 | 4.13  |
| COP-157                                            | 78.84 | 4.45 | 7.32 | 5.32  |
| COP-156-amine (LiAlH <sub>4</sub> )                | 73.62 | 5.59 | 5.82 | 5.86  |
| COP-156-amine (BH <sub>3</sub> -THF)               | 70.49 | 5.55 | 4.55 | 9.15  |
| COP-156-amine (BH <sub>3</sub> -Me <sub>2</sub> S) | 69.90 | 5.30 | 5.30 | 9.44  |
| COP-156-amidoxime                                  | 66.21 | 4.94 | 8.13 | 13.04 |

## References

- S1. Langer, P.; Anders, Joachim T. *Eur. J. Org. Chem.* **2002**, 2002, 686.
- S2. Aakeroy, C. B.; Smith, M. M.; Desper, J. *Cryst. Eng. Commun.* **2012**, 14, 71.
- S3. Fournier, J.-H.; Wang, X.; Wuest, J. D. *Can. J. Chem.* **2003**, 81, 376.
- S4. Ozdemir, E.; Thirion, D.; Yavuz, C. T. *RSC Adv.* **2015**, 5, 69010.
